# Supplementary material for: Remotely addressable magnetic composite micropumps
Source: Royal Society of Chemistry journal article supplement (doi:10.1039/c2ra01318e), 2012-01-01
Supplement: c2ra01318e.pdf [file c2ra01318e.pdf]

two\_pumps.mp4:

"Two Addressable Micropumps"

This video shows two addressable micropumps in microfluidic channels to demonstrate the magnetic composite disabling method in a useful application.

Keywords: micropump, magnetic actuation, microfluidic channel, magnetic addressing

five\_select.mp4:

"Five Addressable Microactuators"

This video shows five addressable microactuators spinning in place to demonstrate the scalability of the magnetic composite disabling method.

Keywords: micropump, magnetic actuation, microfluidic channel, magnetic addressing
